# Supplementary material
Source: Springer Nature journal article supplement (https://www.springermedizin.de/resource/supplementary/12943_2014_1298_MOESM9_ESM.pdf/9553226)

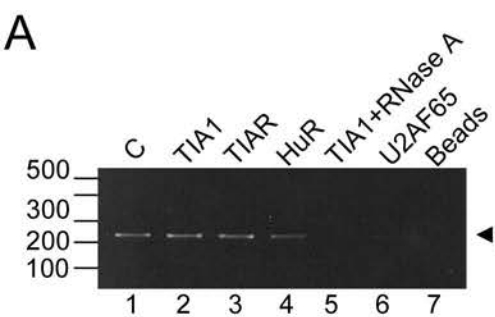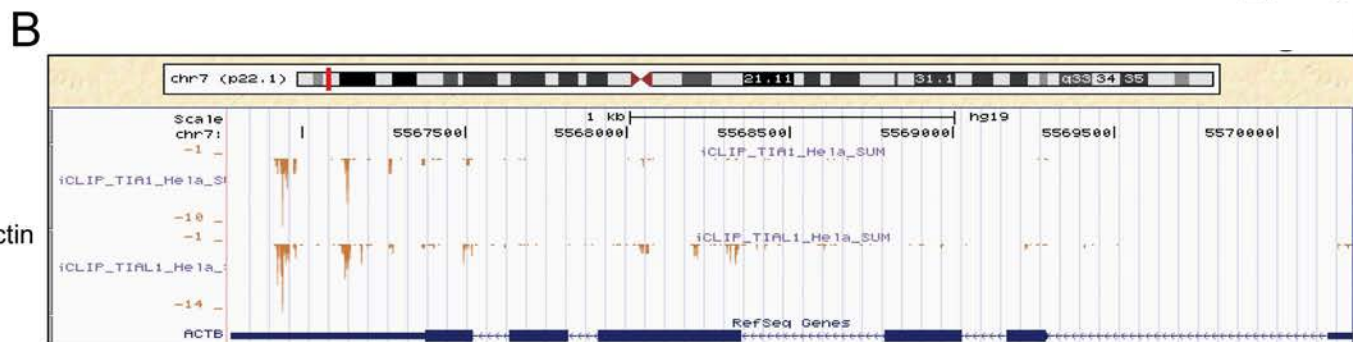

**C**

gi|168480144|ref|NM\_001101.3| Homo sapiens actin, beta (ACTB), ACTB mRNA 3' UTR

Probe 1 (P1):

TAGGCGGACTATGACTTAGTTGCGTTACACCCTTCTTGACAAAACCTAACTTGCAGAAAACAAGATGAGATTGGCATGGCTTTATTGTTTTTTTTTGTGTTTTGTTTTGGTTTTTTTTTTTTTTTTTTTGGCTTGACTCAGGATTTAAAA  
ACTGGAACGGT

Probe 2 (P2):

GAAGGTGACAGCAGTCGGTTGGAGCGAGCATCCCCAAAGTTACAATGTGGCCGAGGACTTTGAATTGCACATTGTTGTTTTTTAATAGTCATTCCAATATGAGATGCGTGTGTACAGGAAGTCCCTTGCCATCCTAAAAGCCACC  
CCA

Probe 3 (P3):

CTTCTCTCTAAGGAGAATGGCCAGTCTCTCTCCAAGTCCACACAGGGGAGGTGATAGCATTGCTTTCGTGTAATTATGTAATGCAAAATTTTTTTAACTTCGCCTTAATACTTTTTTATTTTGTGTTTTATTTTGAATGATGAGCCT  
TC

Probe 4 (P4):

GTGCCCCCCTTCCCCCTTTTTGTCCCCAACTTGAGATGTATGAAGGCTTTTGGTCTCCCTGGGAGTGGGTGGAGGCCAGGGCTTACCTGTACTGACTTGAGACCAGTTGAATAAAAGTGCACACCTTAAAAATGA

**D**

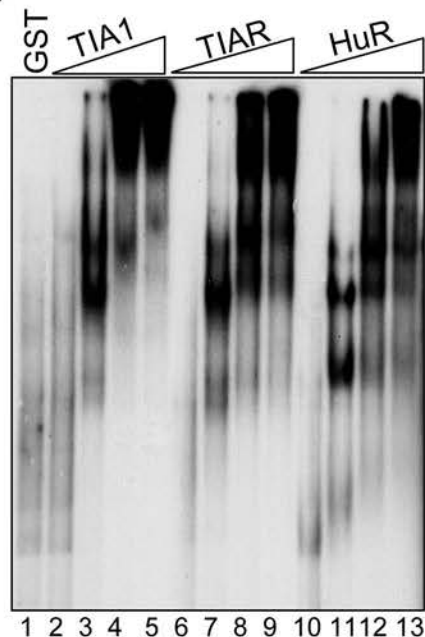

**E**

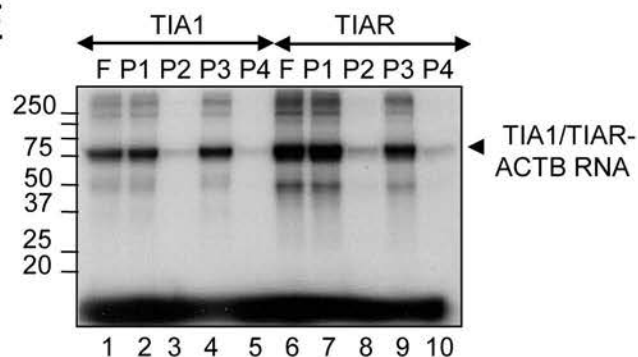

**F**

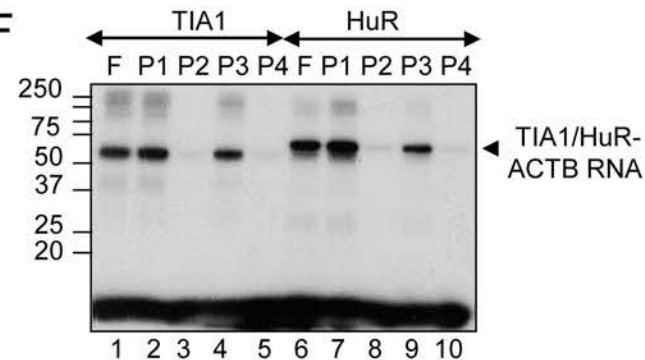

Supplement: MOESM9 [file 9553226]
